# Supplementary material for: Amplified response of drug-induced liver fibrosis via immune cell co-culture in a 3D in vitro hepatic fibrosis model
Source: Royal Society of Chemistry journal article supplement (doi:10.1039/d4bm00874j), 2024-01-01
Supplement: d4bm00874j1.pdf [file d4bm00874j1.pdf]

# Amplified Response of Drug-Induced Liver Fibrosis via Immune Cell Co-Culture in a 3D *In Vitro* Hepatic Fibrosis Model

Hyewon Jung<sup>1,3†</sup>, Mi-lang Kyun<sup>1†</sup>, Ji-In Kwon<sup>1,4</sup>, Jeongha Kim<sup>1,4</sup>, Ju-Kang Kim<sup>1</sup>, Yu Bin Lee<sup>1\*</sup>, Daeui Park<sup>2\*</sup>, Kyoung-Sik Moon<sup>1\*</sup>

<sup>1</sup>Department of Advanced Toxicology Research, Korea Institute of Toxicology, Daejeon 34114, Republic of Korea

<sup>2</sup>Department of Predictive Toxicology Research, Korea Institute of Toxicology, Daejeon 34114, Republic of Korea

<sup>3</sup>Human and Environmental Toxicology, University of Science and Technology, Daejeon, 34114, Republic of Korea

<sup>4</sup>Department of Food and Nutrition, University of Hannam, Daejeon, 34054, Republic of Korea

† These authors contributed equally to this study as first authors.

\* These authors contributed equally to this study as corresponding authors.

**Yu Bin Lee**

E-mail: yubin.lee@kitox.re.kr

**Daeui Park**

E-mail: daeui.park@kitox.re.kr

**Kyoung-Sik Moon**

E-mail: ksmoon@kitox.re.kr

## Keywords

*In vitro* liver model, liver fibrosis, inflammation, TGF- $\beta$ 1, Methotrexate

## Supplementray Information

Supplementary Table 1. Primers used for quantitative real-time PCR analysis.

| Gene           | Forward (5'→3')                 | Reverse (5'→3')                  |
|----------------|---------------------------------|----------------------------------|
| <i>TIMPI</i>   | CGC TGA CAT CCG GTT CGT         | TGT GGA AGT ATC CGC AGA CAC (T)  |
| <i>MMP1</i>    | CCT CGC TGG GAG CAA ACA         | TTG GCA AAT CTG GCG TGT AA       |
| <i>COL1A1</i>  | TGT TCA GCT TTG TGG ACC TCC     | CGC AGG TGA TTG GTG GGA TGT      |
| <i>TGF-β1</i>  | CAG AGT GGT TAT CTT TTG ATG     | CTT GCA GTG TGT TAT CCC TGC (TG) |
| <i>FN1</i>     | CAT CGA GCG GAT CTG GCC C       | GCA GCT GAC TCC GTT GCC CA       |
| <i>MyoG</i>    | TCA GCT CCC TCA ACC AGG AGG (A) | TGT GAG AGC TGC ATT CGC TGG      |
| <i>MyoD1</i>   | TTT GCC AGA GCA GGA GCC CCT (G) | TTT GAT CAC CTG AGC GAG CGC      |
| <i>CRP</i>     | ACT TCC TAT GTA TCC CTC AAA (G) | CTC ATT GTC TTG TCT CTT GGT      |
| <i>HAMP</i>    | CAC AAC AGA CGG GAC AAC TT      | CGC AGC AGA AAA TGC AGA TG       |
| <i>C3</i>      | GCC AAG ACG AAG AGA A           | GGC ACC CAA AGA CAA C            |
| <i>β-actin</i> | GGA CTT CGA GCA AGA GAT GG      | AGC ACT GTG TTG GCG TAC AG       |

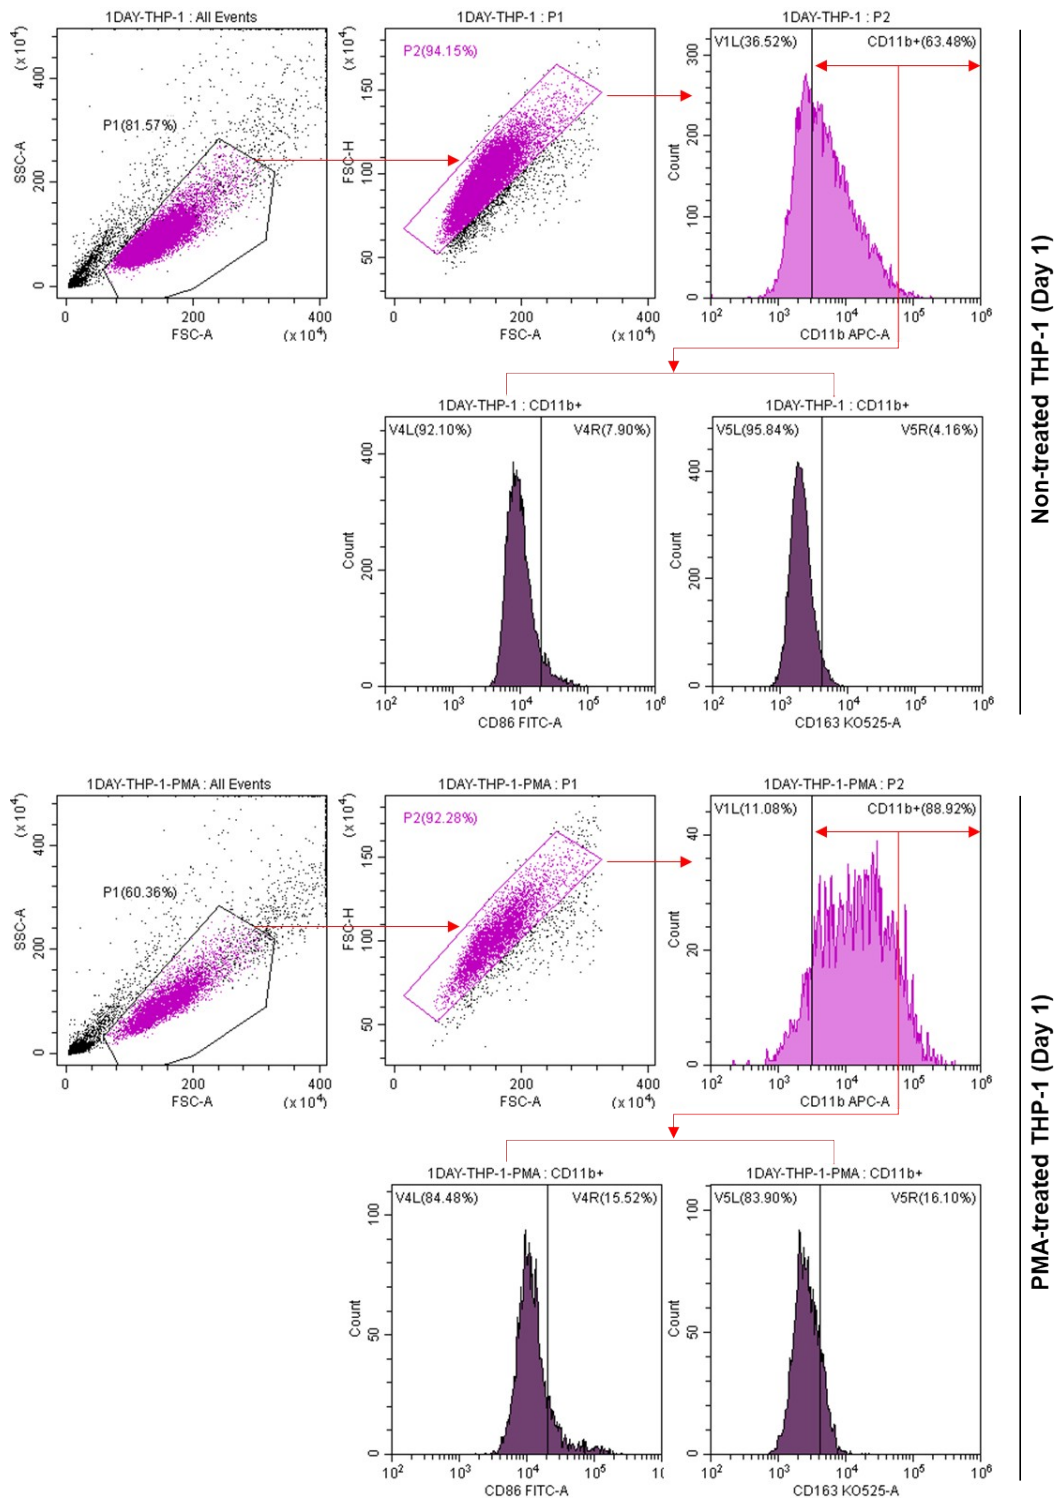

Figure S1. Flow cytometry (FACS) gating strategy.
